# Supplementary figures and images for: Differential adhesion and fibrinolytic activity of mesenchymal stem cells from human bone marrow, placenta, and Wharton’s jelly cultured in a fibrin hydrogel
Source: PubMed Central journal article supplement — J Tissue Eng. 2019 Apr 11;10:2041731419840622. doi: 10.1177/2041731419840622 (PMC6460889; doi:10.1177/2041731419840622), 2019-04-11

# PL-MSCs

a)

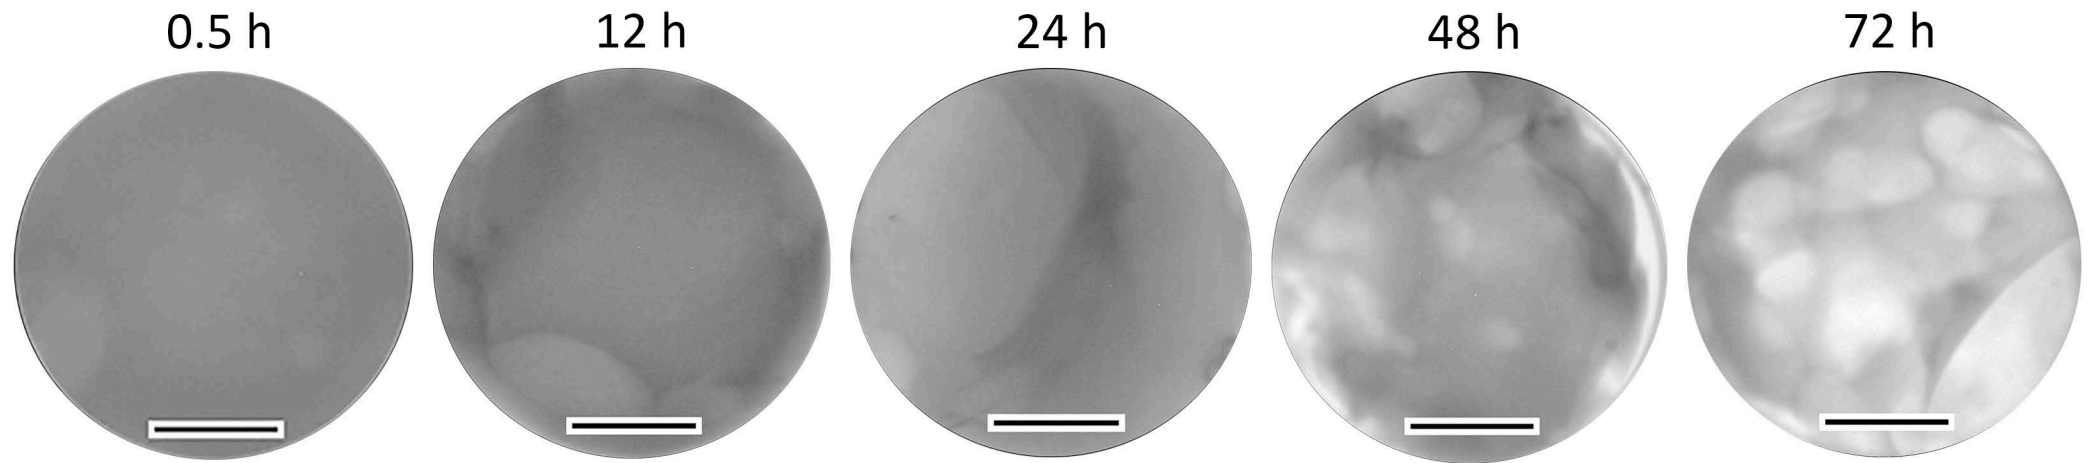

b)

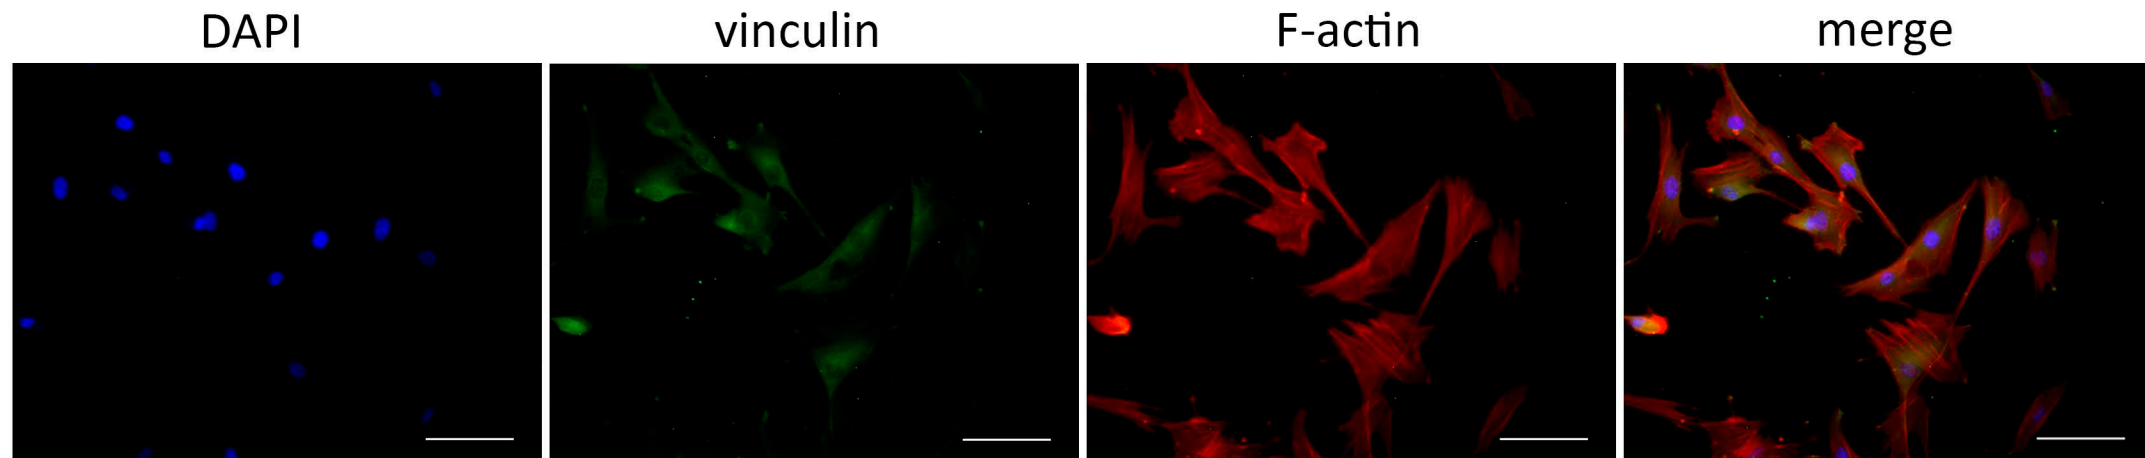

Supplement: Figure_S1_2.pdf [file Figure_S1_2.pdf]

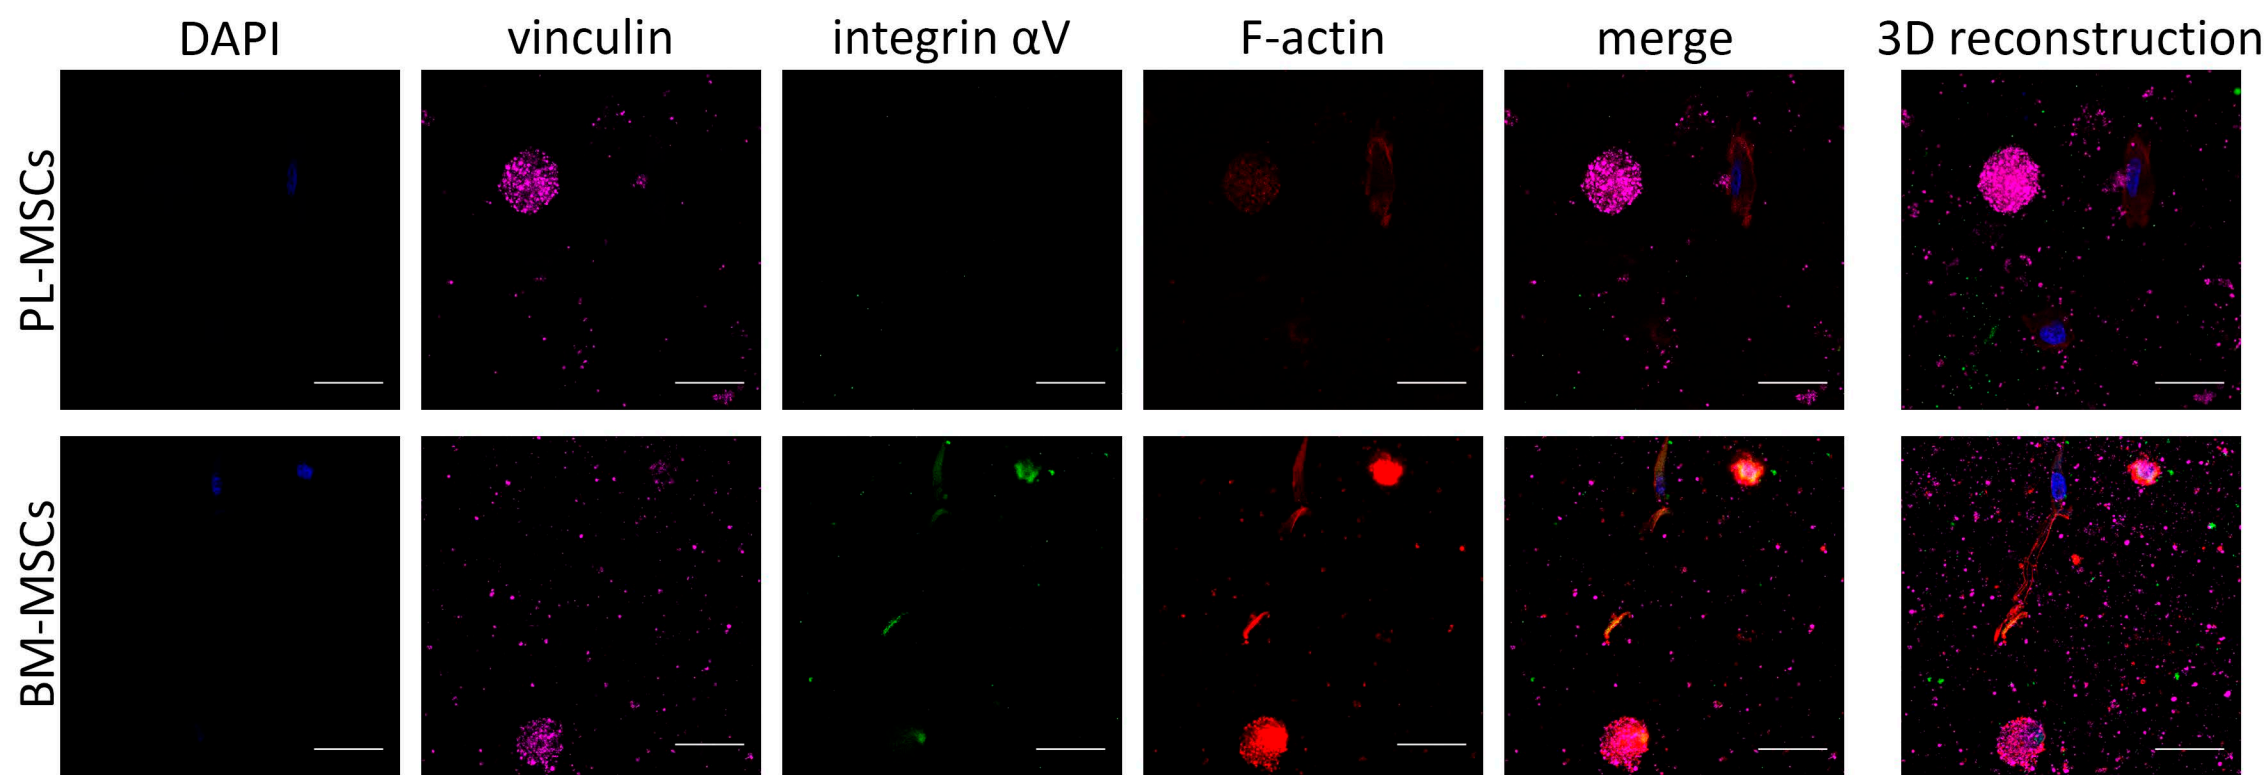

Supplement: Figure_S2_1.pdf [file Figure_S2_1.pdf]

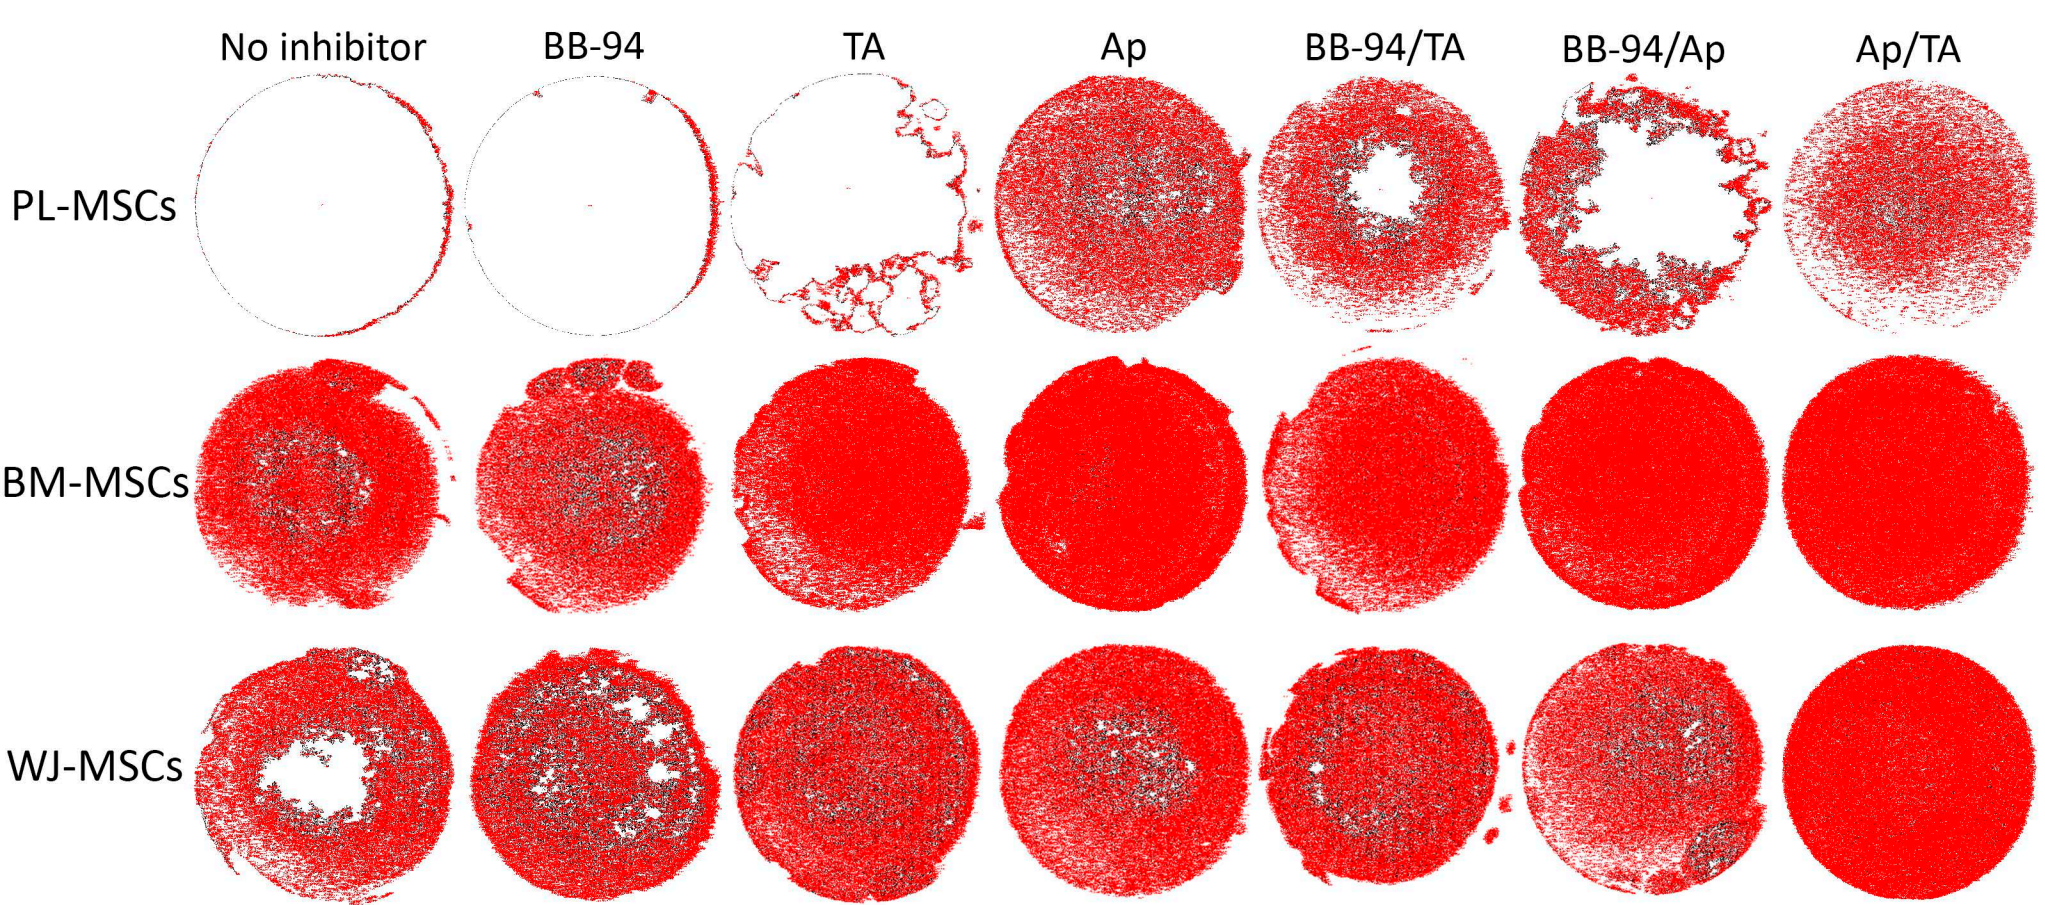

Supplement: Figure_S3.pdf [file Figure_S3.pdf]
